# Supplementary material for: Interaction of human keratinocytes and nerve fiber terminals at the neuro-cutaneous unit
Source: eLife. 2024 Jan 16;13:e77761. doi: 10.7554/eLife.77761 (PMC10791129; doi:10.7554/eLife.77761)
Supplement: Figure 5—source data 1. [file elife-77761-fig5-data1.xlsx]

## Sheet: Descritpive_stat
	HC1	HC2	HC3	HC4	HC5	SFN1	SFN2	SFN3	SFN4
Number of values	883	444	458	505	842	830	793	548	621
Minimum	4.415	4.406	4.63	4.406	4.185	4.465	4.381	4.515	5.488
25% Percentile	7.275	6.43	7.093	7.353	7.631	6.867	7.461	7.781	8.371
Median	8.495	7.846	8.677	8.733	8.807	8.126	8.773	8.748	9.792	median	8.733	STDEV.S	0.536631
75% Percentile	9.767	9.644	10.21	10.13	10.01	9.749	10.22	9.934	11.38
Maximum	17.42	17.44	15.3	17.82	17.05	15.1	17.07	15.59	17.48
Range	13	13.04	10.67	13.41	12.87	10.63	12.68	11.07	11.99
Mean	8.658	8.237	8.74	8.808	8.889	8.445	8.964	8.901	10.01
Std. Deviation	1.852	2.242	2.121	2.093	1.943	2.102	2.109	1.743	2.063
Std. Error of Mean	0.06232	0.1064	0.09909	0.09312	0.06695	0.07295	0.07488	0.07444	0.08279
	CTR1	CTR2	CTR3	CTR4	CTR5	SFN1	SFN2	SFN3	SFN4
Number of values	44	61	136	118	37	88	31	60	65
Minimum	21.7	20.8	17.16	19.08	18.88	20.12	24.93	18.91	20.78
25% Percentile	27.14	26.78	22.21	29.26	32.66	28.12	30.17	26.28	32.31
Median	32.01	31.68	26.27	33.27	37.02	32.46	35.28	29.79	37.5	median	32.46	STDEV.S	3.5349
75% Percentile	41.41	37.07	33.18	40.47	42.19	38.29	43.11	35.65	43.98
Maximum	79.56	59.61	70.88	68.84	54.33	54.3	62.71	53.01	67.05
Range	57.86	38.81	53.72	49.76	35.45	34.18	37.77	34.1	46.26
Mean	35.11	33.37	28.68	34.85	37.81	33.39	38.2	31.91	38.07
Std. Deviation	11.46	8.579	8.708	8.726	7.45	7.618	9.511	8.439	9.232
Std. Error of Mean	1.728	1.098	0.7467	0.8033	1.225	0.8121	1.708	1.089	1.145
factor	3.7681	4.03773	3.02754	3.80969	4.20347	3.99459	4.02143	3.40535	3.82966		3.82966	STDEV.S	0.363913

## Sheet: values
Pre									Post
HC1	HC2	HC3	HC4	HC5	SFN1	SFN2	SFN3	SFN4	HC1	HC2	HC3	HC4	HC5	SFN1	SFN2	SFN3	SFN4
7.12805	10.9386	8.48145	12.2513	11.6842	7.52907	9.36547	10.2975	7.47263	51.2751	21.1245	25.2285	34.8403	37.0817	28.6476	42.1951	23.787	53.4894
10.4924	8.36798	13.657	9.51462	8.34603	5.04942	11.7128	12.9208	9.51345	39.0893	28.1551	39.2094	25.5375	41.7861	24.1876	62.7081	30.3487	34.2869
8.24814	6.03372	7.57699	8.2516	8.71673	10.1136	8.43096	7.83184	11.7077	27.1126	59.6108	21.9137	29.3314	29.25	47.9744	41.2262	35.261	20.7831
8.52401	9.82379	6.22991	10.1209	12.1313	6.20739	9.71278	12.6247	13.378	27.2082	29.2834	35.7028	41.6629	41.6618	28.9618	43.1129	50.0403	33.4452
7.88047	8.80446	6.77521	11.3556	10.7082	5.9218	7.9065	9.60083	6.86389	36.2617	25.049	27.768	31.3041	44.1169	24.6551	29.114	26.7806	46.9554
8.6247	7.03299	6.21969	8.46575	9.82961	6.21828	7.44837	12.9289	10.9623	59.74	32.8641	56.2801	32.403	44.0527	38.6994	31.6143	23.1718	38.14
8.52784	7.45894	7.64564	8.19028	10.6709	5.88752	8.86855	7.79007	8.60186	34.2886	25.1133	29.9218	30.3423	33.8493	32.4724	50.5089	20.0787	49.3714
10.0971	8.23652	7.48538	7.70007	6.2888	5.07378	7.7919	8.34373	7.42362	26.1557	35.9213	22.5204	29.9402	45.6237	35.0519	32.1468	51.1998	31.2172
5.18618	10.5903	7.65121	7.82987	6.46978	6.25641	7.78708	6.64454	9.43045	33.132	24.7461	46.3111	28.3323	32.6285	26.1779	42.2758	27.9597	37.0356
7.99846	8.58575	9.72061	7.52398	10.0172	7.57246	7.61534	7.80184	6.94575	31.6352	30.6657	30.836	33.1414	53.1707	29.075	43.4222	28.545	34.7912
9.15426	7.23733	7.92729	9.23062	11.7278	7.24465	6.40324	9.98538	9.14601	25.9842	28.7111	32.7319	40.9826	32.0254	28.1113	39.6906	51.3745	34.0189
8.26755	14.5764	9.30399	7.32494	10.9786	6.03561	11.0535	7.19619	11.4361	39.379	44.3964	23.1887	35.1877	38.2803	25.8612	45.8299	27.8897	38.3995
7.82251	7.22378	5.33747	8.51521	10.5541	5.76029	8.7162	12.7373	8.14887	32.4874	30.7315	44.846	31.925	30.2409	33.319	34.1906	29.2363	33.0775
8.99717	10.3876	8.73812	9.09082	8.87836	7.35608	6.03239	8.63483	9.77604	22.4934	23.9301	70.884	33.7646	43.0427	36.6751	33.6948	33.5378	32.9993
9.18307	11.066	11.63	7.85868	9.23081	6.34135	7.88184	6.58029	13.3709	29.0882	31.1809	22.7349	32.3799	39.0153	28.8139	42.8416	23.8529	54.4546
7.67135	7.84047	11.89	5.26749	15.9487	5.41818	9.04336	8.37331	13.4723	25.9406	31.679	22.9988	40.383	28.6548	24.1969	27.4098	38.0329	35.3978
7.42803	5.48212	11.0451	8.85955	5.48426	12.6106	6.1114	12.4432	8.36354	41.893	42.9577	26.995	53.6076	49.4295	21.3245	62.4511	35.889	40.9592
7.32025	5.57165	12.8301	12.4968	7.09388	7.0259	7.07812	12.452	8.05526	21.7042	34.3815	21.0927	37.7556	39.1488	35.7473	35.2797	23.2792	48.3471
9.8351	10.2114	10.7777	5.56415	5.88252	6.43424	10.7281	8.65843	12.4182	43.6264	48.4756	38.2776	50.5976	33.6407	22.7484	37.4779	32.3531	39.4733
9.61004	7.28036	10.5497	8.18023	8.92148	5.06581	12.2968	10.3322	8.57991	23.6333	30.3472	26.3306	29.844	40.0869	41.4303	24.9348	32.5072	47.7362
6.78118	5.47863	6.09475	8.49797	8.76363	8.03972	9.93531	8.33196	11.1089	30.7484	36.4992	21.3341	34.4684	42.5886	24.0832	30.1737	27.1293	44.7024
8.58157	6.42965	9.05524	10.2199	14.7351	8.50305	10.7793	13.1153	11.4876	25.5298	24.1632	33.5189	26.9749	31.3003	34.6224	48.5929	23.1727	47.6863
9.3709	6.06604	9.75377	7.14851	7.13245	7.86307	8.38199	9.51533	8.77477	33.6381	31.7862	22.0251	36.0306	34.46	29.3745	39.6195	32.016	39.83
12.0101	8.66015	10.2118	8.09068	6.94512	7.53285	9.17647	9.53985	8.13789	39.9415	24.8096	30.3035	29.7381	35.7621	29.2674	31.5377	35.7653	25.0033
7.55981	10.2176	12.6247	11.0393	8.04697	7.9589	9.06358	9.13114	11.8796	24.6891	32.2438	23.4426	22.3299	29.7662	41.6598	28.7108	34.8739	40.8074
5.43487	6.60628	8.20369	9.31848	9.11373	8.35061	10.8937	10.1703	8.7157	44.7342	24.4488	24.7967	27.1323	50.8145	23.7709	29.8926	31.472	37.3604
7.5021	5.50286	12.1796	8.50568	9.59298	14.5411	7.50537	8.27489	11.2796	33.013	25.2954	22.3769	28.5582	35.4901	35.6956	31.5217	46.1072	37.7965
8.53085	9.07948	9.07401	7.55694	9.73786	8.03389	8.24165	11.2067	8.42443	28.1808	37.1222	17.8188	56.95	37.023	41.6078	29.0277	19.8972	67.0465
9.68609	11.4917	8.08839	8.84292	9.46924	6.15773	7.90813	8.85808	11.6093	29.9991	37.0087	20.1688	34.6548	28.0686	24.017	30.1376	25.211	37.4965
11.6385	8.93295	8.57777	10.0996	8.49432	4.85136	9.72583	10.5773	11.2098	24.8048	30.5734	31.8974	32.0876	32.6858	24.6343	48.6807	41.33	40.0515
5.90508	6.28931	5.17525	5.84892	14.6305	9.8993	11.7789	10.2817	9.34683	28.3741	31.7214	21.9607	35.3417	41.7254	27.8429	34.1601	53.0066	43.404
8.71439	14.9728	6.03656	6.54376	7.22685	10.9173	11.0864	12.0521	11.5532	29.0863	46.5836	17.1612	23.7981	36.4547	26.9719		24.2987	32.3501
5.6309	10.6299	8.91398	6.66195	6.27839	8.70385	14.1171	8.39289	8.70729	50.1042	33.4028	23.4481	47.0952	41.1134	33.3772		47.0843	45.2866
8.7642	6.45502	9.41709	7.92609	9.81734	10.4764	10.2953	6.67883	12.4554	30.2872	48.938	20.5337	20.1313	54.3339	39.2099		31.0171	32.3626
7.07951	11.7544	8.10155	9.83032	8.10173	8.82177	6.89077	9.05017	16.3267	22.4292	34.5565	23.8796	29.6541	18.879	31.166		40.5677	48.4174
8.79355	8.18305	11.2501	11.4501	11.185	5.40104	7.82743	9.93623	12.7939	34.0754	53.767	21.1201	36.28	37.0247	35.9365		41.2864	33.2871
8.38841	8.5202	8.75695	11.3043	7.12141	5.49379	5.82786	9.28433	10.3658	47.6911	34.9344	18.1515	47.4511	34.5272	35.3775		25.2042	40.7301
7.99066	8.59594	6.70784	10.0786	9.06903	9.99165	8.73686	8.53039	9.80646	31.2398	30.1935	23.5783	42.1947		29.7737		18.9098	31.366
7.76096	5.08689	10.0441	9.65518	8.53359	5.4194	12.321	8.64019	7.8626	79.5613	42.4203	19.1453	51.9056		32.4532		35.3058	34.8241
4.95251	6.47951	5.08874	8.26895	6.92622	7.50803	13.5492	9.12947	13.6454	46.8103	34.7521	24.6708	38.7976		30.8592		29.2113	47.5729
9.94125	10.8465	7.28796	9.51024	7.65896	9.64503	6.89032	8.94885	12.9699	32.3948	36.3629	21.126	33.9688		41.6632		29.2195	42.0708
9.54542	6.11856	5.90524	8.3733	9.58177	7.82211	8.68158	8.75501	7.45467	45.292	35.0362	27.3701	46.841		45.2423		32.3668	27.4687
7.23139	9.64281	9.13199	7.23312	6.43615	7.81788	6.07083	7.79757	7.87661	28.697	25.7055	21.6384	46.0097		42.9265		27.9608	41.4689
8.90644	8.08473	6.4219	9.15969	6.47302	9.7612	6.43939	9.17723	13.9415	51.5243	28.1318	28.3279	32.0282		32.7093		28.9606	34.7683
7.24566	7.61231	11.5014	6.97418	12.7824	11.0894	8.3425	11.2313	7.89283		39.4451	19.6954	44.8488		29.8767		46.6617	22.0225
10.7248	5.88906	11.4118	7.81016	4.18543	10.0822	9.29723	4.95845	8.86989		29.6864	23.205	31.6021		28.6598		28.0331	31.3986
6.892	5.41153	5.97285	9.41158	10.0883	9.24023	6.3215	9.69978	9.34872		27.5638	24.3327	28.3191		29.023		27.5348	55.2482
8.20006	5.67657	10.4159	8.18226	7.63838	6.35545	7.81966	10.6974	10.5611		25.8981	18.2419	31.5985		27.8907		30.4325	21.7547
7.10722	6.66361	5.53334	10.1433	11.4408	9.4357	10.3594	8.3623	11.2632		25.863	36.5841	35.1352		20.1213		40.6266	28.8282
7.93617	4.61155	9.02103	8.79734	7.23702	6.36521	7.78139	9.10116	9.47437		21.0985	32.5164	34.9539		28.6309		34.5513	54.9927
10.2186	9.47193	9.94737	7.98257	6.21926	6.35017	12.0848	8.59417	7.18756		37.6713	22.2512	37.1622		37.4934		34.3798	32.3232
8.19987	6.88475	8.45888	10.2219	8.54833	11.0527	9.17472	11.6493	15.9438		26.5773	25.3948	42.8549		42.8522		20.1277	32.2954
8.49628	10.1881	10.8027	8.81367	8.19241	8.55029	7.74273	8.16076	10.1503		29.0049	51.396	30.9183		26.2303		21.5588	30.6599
9.96754	6.32705	6.92004	8.89125	7.71618	8.30716	10.2224	9.61581	12.4243		43.879	28.6427	48.6226		28.2017		34.7163	27.0483
11.1294	7.8509	8.91331	8.71412	8.48129	9.84347	10.6164	9.1926	12.5499		54.4965	33.398	46.3846		34.8419		27.3666	30.7595
7.43873	9.89213	10.1905	8.58238	9.51255	4.9508	7.24853	11.3433	8.9052		26.9757	35.9116	35.5382		34.3922		26.9908	39.7925
8.37107	7.1967	9.05233	8.73288	9.7736	11.0585	8.16558	8.79314	14.7304		41.4389	20.9581	38.2361		54.299		23.0098	37.803
5.14118	8.0625	13.1056	10.5272	6.15225	11.922	9.0858	9.86617	9.87645		41.6804	20.8816	20.9777		34.5261		28.8042	31.2517
6.14255	8.39897	7.22578	7.04034	8.16299	7.38641	9.53542	9.42814	12.155		35.0116	40.7864	24.5428		36.017		36.9545	23.8694
5.86612	8.24789	8.86895	9.4285	7.85264	9.274	8.463	10.0487	16.8326		20.7961	21.0989	25.5573		44.3341		26.1084	52.8256
5.87986	5.40029	8.24998	7.93929	9.31221	9.75226	9.8546	7.77836	7.28584		28.4767	26.9737	30.0987		35.0533			32.6973
7.74609	5.41224	7.34051	7.20267	9.17856	9.65915	10.5953	7.26672	10.4809			31.2206	29.3171		29.8433			39.9854
10.6916	5.65006	7.19425	9.50203	8.50659	6.87678	10.342	11.9671	11.9794			34.6575	28.0649		27.7842			44.4653
7.6129	10.0026	9.55995	6.13456	9.58033	6.60243	6.66528	8.26192	12.3385			46.2685	38.1929		20.281			43.4979
10.0224	9.27924	9.24757	8.15164	9.64007	7.36338	8.61088	8.38103	9.25465			38.4357	43.3903		42.7627			23.2455
11.9186	6.90449	9.32089	7.08985	11.3222	6.71237	8.91605	8.21373	11.3512			28.1538	27.5113		28.1661
8.96363	12.5613	10.3492	7.71425	9.6712	5.16631	9.53396	9.33143	11.6737			25.0666	30.3522		53.3884
8.57575	5.91384	9.83423	6.76477	12.9588	12.3463	9.64638	10.7208	8.70059			21.0703	25.4192		41.6876
7.61158	6.39045	8.33374	12.0792	8.02646	6.69224	9.77511	9.23324	11.3665			39.9699	24.9618		29.3297
7.95012	7.63687	10.2981	9.22807	6.41675	9.96175	6.26982	8.28061	7.85171			19.645	36.2446		25.8045
6.29191	10.5815	7.02643	7.35876	7.78245	6.67562	5.7818	7.45984	9.71263			25.3989	32.6829		31.5998
7.98386	7.48839	10.3098	7.12089	8.75128	8.83714	6.89356	6.56446	8.91738			21.7551	37.8873		48.2162
7.53436	8.13818	12.091	9.37787	8.14973	8.59437	10.5808	4.51469	11.3838			24.0081	25.5558		28.5342
9.9312	6.39725	8.73391	12.5649	9.96244	8.35435	9.08635	8.01581	7.41815			19.7382	24.3317		38.3142
8.0528	5.64196	5.47309	12.4474	10.7296	10.6259	8.71474	10.356	7.6696			23.4515	45.3661		29.7072
9.32201	12.7758	8.54034	6.43607	10.7863	9.32652	12.2357	12.8226	8.35586			29.1065	34.5558		48.1881
11.5994	6.25611	7.07836	10.6096	9.2279	5.36442	14.6301	8.44239	12.9919			20.8844	30.7121		37.9578
7.27985	7.361	12.8726	7.39547	12.973	7.82938	6.50782	7.99739	8.15004			32.3224	25.8186		38.7968
5.64761	6.69583	9.09777	4.84332	6.36952	6.96715	5.68287	6.93072	13.5311			31.7531	32.7054		38.234
10.437	12.2327	7.69677	8.18052	8.6685	9.09916	10.5178	9.1909	8.3715			22.1946	41.2658		34.8891
6.98661	5.73425	8.9527	10.002	10.0695	6.89877	5.6401	8.18487	13.5901			26.1474	35.7617		51.8823
8.34967	6.79459	8.23939	9.26477	6.16533	9.25535	8.10775	9.25757	10.9906			24.2669	34.3895		38.6773
7.10479	10.2999	5.64553	6.29329	10.3251	6.33227	11.6295	7.11604	10.4414			21.2286	32.2476		35.7419
5.91685	5.35635	8.25596	8.21923	7.7136	8.81156	8.06547	8.97384	8.76447			34.6447	34.2364		39.8958
8.72816	14.2142	12.3328	8.02489	9.57061	8.39275	12.9864	9.58791	14.5349			34.0793	30.2686		29.6739
9.25109	11.7506	6.69461	9.20938	10.7508	8.92231	8.73379	9.16297	7.8789			28.0804	30.7386		36.2766
11.6119	7.28341	7.36437	8.11896	6.50734	11.6619	10.523	7.70277	11.7787			21.3114	41.2009		25.0098
7.03911	8.9136	10.6288	9.61812	5.08267	9.7168	9.97745	8.22068	8.37509			40.0882	19.0764		27.2033
12.0035	7.12291	5.69075	10.092	7.73923	13.9114	6.42527	9.45286	7.045			29.6357	19.8503
12.6411	8.67604	8.63921	6.12729	8.32428	6.49608	7.85424	7.55213	12.4594			28.3109	41.8114
11.3512	10.3157	6.50038	9.36619	6.84025	5.98357	10.5863	7.12858	10.1742			22.7967	27.4582
6.95756	7.69547	14.5547	8.19222	7.88921	8.32597	6.30822	8.40942	9.82002			33.7125	33.3961
7.97036	6.04387	9.32479	6.00609	6.98135	7.70294	10.5358	8.22429	11.8252			26.4745	24.0816
11.536	6.9478	8.02931	7.96392	4.91154	10.3519	8.25654	10.8078	10.8648			23.8961	33.1104
12.5443	10.9661	5.83146	10.098	8.13145	6.07201	9.95142	7.06826	7.90354			24.993	40.9868
7.77269	6.27208	7.93808	8.66713	9.83634	9.12065	9.57915	11.1758	9.81974			26.2107	29.1012
7.03269	12.3108	7.40712	7.32408	6.42623	5.24614	11.6334	6.69934	7.99125			25.7223	31.8161
10.4342	5.82753	9.48151	6.29865	9.19548	13.5139	9.32917	6.49381	10.6634			19.8644	39.6478
6.88741	5.15511	7.07186	7.82158	9.32317	10.3949	5.46181	7.97926	11.0459			45.4727	55.0009
11.0974	6.00336	9.99193	6.36495	7.55819	5.90378	9.96935	7.33659	9.15264			21.1133	46.0041
8.61078	4.8198	10.1103	8.43041	9.30909	6.38989	10.8215	9.15216	8.27998			21.8187	32.1138
7.59573	10.0216	10.5337	13.0165	8.03524	8.13251	6.72691	7.20875	8.92883			36.3208	57.7555
7.48616	6.25429	8.49376	6.42784	10.2308	9.44222	7.6931	9.76166	6.20039			23.5986	22.867
5.97759	7.81869	6.29951	11.743	10.9458	8.81077	6.58758	8.86275	11.1128			21.2745	48.3957
10.887	4.78846	6.33939	6.60694	7.00454	10.6651	10.3164	8.46559	7.40363			21.9663	25.3336
8.19702	11.2175	8.67671	8.17638	7.85748	7.23528	11.7738	8.92557	10.7956			25.9601	31.8141
9.91997	6.91734	7.68244	9.76678	10.7374	5.58125	6.13354	10.5112	9.9859			20.5648	40.718
7.79941	7.96475	5.55983	12.1137	6.76366	5.37603	8.3592	7.6342	8.27328			27.9823	31.496
8.0654	5.5979	9.79649	6.72042	13.4103	6.40665	13.0726	6.14418	11.3246			30.8177	26.4666
9.34183	9.82017	10.1319	10.402	11.2836	8.85801	7.54812	11.0986	6.78862			24.7239	33.4392
9.25218	6.33103	12.5442	13.7455	9.09573	11.1631	10.8264	8.40197	9.52439			22.7011	33.595
7.30229	12.4828	13.2367	7.65961	12.3348	10.644	9.89082	10.741	7.85526			33.3278	38.1782
10.5307	10.6918	12.009	8.88494	5.81841	6.67076	7.55511	10.0722	11.4221			26.6621	41.7531
10.4304	8.8537	6.41943	10.1376	7.31439	7.90265	6.65929	8.33225	11.1418			43.1657	28.8874
8.98683	8.6854	8.99373	11.4922	11.4495	5.22043	9.19415	9.47147	8.99231			24.1527	68.8391
6.56743	8.11573	6.59585	6.99437	9.60952	6.46194	10.4725	7.50208	10.1618			37.5142	43.3548
6.19675	7.40917	9.49289	9.05335	7.58798	7.1124	9.31641	9.08329	10.8578			34.9224	26.811
13.0359	6.81016	5.42493	9.05248	7.37034	6.36757	10.17	8.69152	9.89339			30.4392	34.9337
11.2879	7.0386	9.33318	9.05623	8.1995	8.98211	9.5052	7.64616	13.5734			26.3906
6.47471	10.3646	8.20103	5.90194	8.4884	10.1217	6.9919	8.56601	9.09969			37.9421
9.62842	13.0732	9.00929	6.59953	9.76953	6.76478	6.99802	7.70678	10.0826			47.5592
9.59631	7.31757	8.1312	7.43811	9.0847	7.15879	6.37268	11.0679	9.9067			23.8725
6.81365	8.36194	7.29486	10.0047	8.96807	13.3039	10.371	7.41493	6.80135			37.6629
7.04144	6.43844	5.61689	10.0411	8.78676	11.4688	6.75326	7.69052	8.04803			21.7797
9.42785	8.42162	9.02705	8.99637	9.39722	11.5015	12.8082	7.10407	7.82682			30.0621
9.46389	10.1808	5.50497	6.85683	7.85776	12.2604	7.6876	5.09974	10.4672			53.9559
7.48955	8.37007	8.31843	6.07312	5.81921	7.3709	9.05167	11.2609	10.2977			26.7801
11.8104	8.49087	7.3654	12.5064	15.5602	12.9397	12.1835	6.33896	8.65213			26.9743
11.3572	6.83427	10.152	9.40344	9.29137	7.3393	9.68023	10.8679	11.8445			27.2677
8.26091	11.1346	5.03855	10.6729	8.25895	5.80427	11.5025	7.48395	8.33271			33.3937
10.4955	7.27435	6.8983	9.52839	7.51453	5.98864	11.1715	8.4021	11.2825			29.6817
7.63745	7.4995	10.3438	7.35067	8.70689	9.40107	11.7645	8.93971	8.1737			38.6295
11.7497	9.28447	5.85549	9.32241	14.0791	6.23111	10.8049	8.47526	9.66327			32.4832
11.907	6.27054	7.84639	10.1192	9.39834	5.12528	7.73014	8.75354	7.82926			32.7125
9.29529	5.37332	10.9294	8.16623	10.4896	9.05406	4.90742	10.1371	10.7373			39.8221
4.61301	17.445	10.2521	9.01637	7.22135	7.21275	7.492	5.06982	12.6179			24.0099
11.5357	6.10498	9.37703	12.6681	6.75889	5.73423	11.9497	8.04706	10.2703
7.31737	7.62085	10.9306	8.70006	7.21432	9.13162	6.50238	7.59928	12.6999
10.8696	5.55296	7.22946	7.11352	6.06775	7.52144	8.90364	9.54294	7.60705
16.349	5.96232	10.5692	10.4503	9.6833	9.81255	5.98902	8.73462	6.53437
9.70001	6.2058	6.03038	7.37051	9.88244	7.98543	10.3341	10.7643	12.1558
6.97484	6.96497	9.93884	8.61452	11.2899	8.53801	8.09228	7.88017	6.75908
8.75567	8.99546	9.90427	7.44875	6.48463	10.0957	8.42954	7.28231	8.26328
8.9042	9.93495	9.33541	7.8502	9.74674	15.0021	9.32164	8.66372	9.61824
6.82488	4.40635	7.34298	8.58872	7.97787	7.18558	11.49	9.34584	10.5362
8.6106	8.47399	6.03834	15.0917	12.0266	8.79792	8.39592	8.76843	11.09
7.00768	8.34285	11.6398	7.01023	9.42069	6.24471	8.54539	9.29093	6.46006
9.49841	9.00286	9.43264	10.2994	7.72798	8.51648	6.27727	7.96538	8.10441
7.38898	11.085	10.2114	11.897	7.28724	9.71842	9.67673	9.20338	7.85185
9.44262	10.1101	10.6026	9.32971	9.40609	7.00082	7.17014	8.11636	7.11465
7.42185	12.1381	5.30845	7.78425	9.68114	9.70882	11.8879	9.73642	7.7745
10.2158	5.6991	10.8019	7.8852	5.7776	8.5888	12.7222	8.86245	9.11661
7.1485	6.04601	9.20564	14.513	6.58337	7.79929	10.1786	8.74162	9.60468
7.76506	8.99335	7.71747	11.6369	9.16925	10.9336	9.47204	7.51476	11.9147
5.75142	6.18956	6.83889	11.0219	8.36842	8.77675	4.63988	8.18283	9.36524
8.94011	10.1043	10.5178	4.40613	6.332	9.23833	9.32354	8.29021	6.8146
9.22187	7.13198	6.99353	9.42761	7.10396	7.68886	9.84583	9.34054	9.87038
9.18503	14.0434	7.55947	10.1687	9.91962	6.46567	10.6635	8.07416	7.95001
13.4055	6.10413	7.54667	7.88213	6.59169	8.07886	10.5232	6.78528	13.1292
6.91263	12.1764	6.53177	9.04931	11.9251	5.41675	9.94245	7.49954	8.37727
12.0548	7.86983	11.2738	8.47985	8.32019	10.2279	8.9517	7.96672	12.1423
8.0629	7.08063	10.3153	8.14123	7.56212	9.53096	9.19382	6.36941	8.38242
9.68094	6.46951	8.53144	9.56709	8.10223	5.62168	9.64581	7.34817	10.6514
8.12868	8.3994	10.5203	7.18987	9.12982	8.82798	6.82863	9.01293	11.7188
11.5778	8.462	6.55073	7.99909	4.70859	6.99801	6.32847	10.5867	7.8546
11.2753	6.12078	14.2309	8.46031	7.06433	8.38341	9.63227	7.54735	8.15518
9.20268	6.76585	9.74933	10.5177	9.54054	11.2264	12.3233	9.24646	8.18236
6.43555	9.61806	7.14274	8.7539	8.03712	5.59042	5.63608	13.4104	11.5187
7.09455	8.00647	5.0485	9.04352	11.872	8.65941	8.38459	8.16782	12.1829
8.96512	8.87793	9.45062	7.86585	8.20654	5.52375	6.69761	6.39459	6.80654
7.39333	12.7401	10.1308	7.89497	7.25004	8.09445	10.5348	7.80141	12.5031
12.1847	6.18533	9.60933	8.19598	9.23397	9.22937	8.58665	5.99324	11.1999
7.10324	5.34268	9.48031	6.08946	7.82831	8.29878	10.6288	10.9312	9.92195
8.39382	7.75831	9.39622	11.3144	8.18337	5.32851	7.69026	8.21069	10.5038
8.09726	5.80515	8.93675	11.1988	9.61029	9.27683	11.0789	8.54456	9.16635
9.65722	6.06895	5.57534	8.49712	4.74202	9.76337	8.06935	8.90277	14.2054
5.56787	10.9159	8.34242	11.8258	6.21036	6.0117	9.27824	10.0136	8.93288
10.2984	7.26813	5.54989	11.5745	6.90665	10.9219	7.54176	8.84366	12.0356
6.24213	9.42265	7.90733	8.14318	9.69893	7.85923	7.70431	8.50481	6.50913
9.48339	7.45868	5.55491	5.22227	9.47147	9.40183	11.8451	9.22697	8.79717
9.26693	9.59016	13.0904	9.85003	9.52617	6.37019	8.57036	5.19714	8.74002
6.26753	10.1728	11.2187	7.15063	7.78115	4.6708	12.2714	11.1209	12.7174
8.63515	7.74581	7.40822	10.2211	9.58453	5.7474	8.37	8.31313	11.3771
11.7947	6.99858	9.77518	8.62009	14.0098	10.6496	12.0458	5.6018	11.0114
8.12762	8.55368	12.189	9.72596	5.78109	9.77528	10.7986	13.3177	9.38682
8.91756	8.81697	8.63245	8.0466	12.5469	10.0974	9.52141	7.73128	9.0164
8.97574	6.29844	7.19003	11.2236	10.1367	7.91661	7.9115	11.1455	7.4248
6.36241	12.4128	8.09897	9.65674	9.38627	9.89103	9.45249	5.91406	7.11141
9.99435	9.01938	8.06133	10.1372	7.82677	7.06705	8.40823	8.93259	9.16803
8.74903	7.25904	6.10325	15.6992	8.43853	10.5473	9.90183	7.97545	9.61635
8.07118	10.3615	8.10339	9.30001	9.30478	4.64753	6.97617	7.29751	8.15924
7.67349	8.12557	8.50464	11.8924	7.63307	5.22033	8.18775	6.50763	10.6339
10.3524	8.27536	12.9433	7.39879	12.6269	9.25166	9.14922	11.2398	11.7897
11.0265	6.1738	8.10772	9.47177	7.38995	8.02413	8.51892	8.16232	9.56905
10.081	9.49865	10.2335	6.36988	7.64427	11.1511	9.45639	9.60999	9.66522
7.20187	6.2493	7.88252	7.50433	8.07526	7.86256	7.98956	12.2337	12.7851
8.55865	9.63548	15.3023	9.0148	10.0238	7.88569	8.04743	11.3721	9.68509
9.83151	12.6027	6.22257	8.02911	7.75719	6.60093	10.582	12.333	9.82216
6.47806	7.53526	12.6713	9.33793	7.26346	6.74273	9.37781	6.88684	11.4761
9.09258	10.9682	9.33332	9.17581	9.94812	11.5557	8.25864	7.80112	10.4486
8.2561	5.57163	6.83374	13.2764	5.87942	9.39356	9.7162	6.40432	8.4828
11.3216	13.9694	9.24427	7.79104	8.64465	9.07897	9.19816	9.31729	10.89
8.88678	9.10136	9.97463	5.62755	8.42293	7.23517	7.91571	6.35426	9.42595
7.70373	7.92568	8.87566	6.57114	15.5677	6.57432	9.93573	9.63818	10.0798
10.9321	15.1424	8.37257	12.7243	9.46772	7.77703	8.129	5.05973	12.6418
6.49767	11.9653	7.5302	7.87448	10.7141	11.2206	8.97783	4.92117	8.34553
7.46169	6.37953	8.20329	7.73144	13.8453	11.1227	8.13541	10.5308	10.9435
7.08202	8.1557	6.76658	8.32821	8.2646	4.59436	11.8725	7.2912	7.56841
7.65237	6.3455	5.04667	9.44495	6.37396	7.91431	10.3615	9.79189	7.82254
9.00195	6.64997	6.27804	11.5788	7.68858	6.59902	10.253	13.3575	11.926
13.2011	6.98867	9.07566	11.5617	8.32537	12.1079	6.02454	5.85195	17.4776
6.48667	8.15445	11.7545	8.08629	7.15195	7.16771	13.887	14.6068	11.3021
10.6347	9.00452	7.25934	8.22115	10.1143	10.5766	5.43413	7.52518	8.06818
10.8994	5.61586	6.80023	5.23229	9.26362	8.48966	9.06265	8.75677	13.4666
8.39591	11.629	8.61825	5.57861	8.80595	8.97266	9.46214	12.0182	8.09389
11.0028	11.8088	6.5059	12.9618	8.44473	9.31833	8.49748	6.82573	9.05943
10.7077	7.09696	11.3721	8.24839	10.0778	8.04153	8.29381	7.76318	14.536
10.6524	6.99692	10.2543	9.46143	7.49087	7.49644	11.1355	10.1778	10.0746
8.22466	8.59001	8.38434	11.2844	7.40843	10.7731	5.95308	9.42078	11.1023
8.85402	10.8488	5.79551	7.73689	11.8325	7.6082	7.68308	8.1814	6.68495
9.21849	5.96806	10.1907	10.4813	6.99277	10.6678	5.54263	8.53731	10.8722
8.91485	8.39405	8.23641	10.4093	7.77454	6.67242	12.3511	9.22167	12.2898
5.20869	7.7623	8.84397	4.77775	15.6671	9.65818	12.3115	8.12967	5.94165
6.31061	10.7932	7.09748	8.45417	5.26952	6.16138	8.50914	7.80509	12.4083
8.65926	6.48518	10.7785	8.28748	10.0085	5.35456	9.67356	9.30509	9.39226
8.45251	7.97595	8.85679	11.8294	8.84793	5.91314	8.37037	10.0634	12.3402
9.27949	6.24803	10.2811	10.9186	9.33928	7.15318	13.8282	8.90248	10.4109
9.66763	9.13892	11.432	7.50626	7.03666	8.88581	7.01602	8.85894	14.337
10.7633	10.4001	9.51769	8.29794	6.73799	9.43959	6.15756	7.46615	12.7017
7.03722	8.12341	8.38559	10.3322	5.93194	9.59979	6.70924	8.54195	7.53606
10.4927	6.39809	7.30861	10.8321	8.36288	8.26198	9.38333	12.3426	8.98527
9.02278	8.26747	5.87995	5.03011	9.26979	13.0297	7.33981	7.38314	10.4706
8.67327	10.7305	6.28001	9.15781	10.1037	8.12856	7.31448	7.26636	7.22094
8.82082	10.3788	9.34156	12.2135	8.53437	10.9126	8.81888	5.36329	9.98277
9.14377	8.1573	10.3854	9.9339	11.9346	7.11193	9.44184	9.65783	8.16839
4.61444	9.03275	6.64406	6.55001	10.8618	6.81971	8.63795	8.6621	8.89456
8.67376	5.86287	10.0486	10.344	7.12855	8.69209	9.49373	10.6185	9.0238
12.63	7.08879	6.38229	10.3479	10.6093	9.66424	8.19728	8.53516	12.4927
7.07165	8.0659	5.80864	15.3329	6.21918	6.19032	9.08229	10.3298	11.3456
9.43228	4.47999	5.07985	4.99175	7.73297	7.61952	7.77345	6.61251	9.88523
9.60974	8.32452	10.0426	10.0779	5.49399	8.35415	9.16124	10.0101	10.7209
9.98852	8.74397	8.7197	5.67761	8.56462	7.69113	15.6277	8.48357	14.4335
8.05607	8.42444	6.28344	8.80145	9.22878	9.23875	5.12915	8.80048	11.5406
8.09028	9.47873	7.34148	9.22958	12.5029	8.03776	6.81182	11.273	9.1297
8.83641	7.83354	7.95865	13.3699	6.9123	10.585	9.60713	10.4996	9.74671
7.0199	5.384	10.3816	11.0661	8.89146	8.93915	8.2022	7.4362	9.15919
10.1698	9.24559	5.8694	8.17227	5.7844	5.97938	8.49771	11.8869	11.78
5.09177	9.75126	8.84506	11.7516	6.35497	6.90035	5.21341	6.9406	12.3431
9.39168	6.53739	8.71941	10.1809	4.73049	9.02419	7.92968	7.13472	13.0937
7.31183	9.64406	5.6123	9.06501	8.26529	6.9642	8.52952	9.47825	10.1866
8.47825	7.16007	6.37453	7.40463	8.35559	7.43576	7.45865	8.38609	5.72817
7.99486	9.44304	8.57295	9.40264	7.68337	5.25331	6.92812	8.02329	8.11583
8.79192	6.84016	11.2735	8.17744	7.0137	7.50064	8.16947	8.11445	9.5677
12.5643	5.29321	12.659	10.5303	7.45185	12.7286	13.4577	8.06059	7.32267
7.27119	6.20796	7.43991	6.16561	7.77213	6.5866	7.46758	10.9928	8.96132
8.1121	4.5383	5.39838	9.65916	6.22795	9.71749	12.6364	5.04447	7.56416
8.31104	7.62751	7.30599	7.3035	11.6343	8.50096	11.135	8.89963	11.3607
8.10793	7.02934	8.63721	6.76101	8.82057	8.88737	9.50468	10.1698	8.21798
10.0656	8.53216	9.11434	9.44785	9.5182	9.60202	9.18574	7.76238	13.1239
10.6129	7.11596	10.9087	12.3961	10.8079	12.2658	8.32365	10.9399	9.61882
11.2634	6.24761	5.79299	7.92619	9.78182	7.06045	10.8058	13.3458	7.40561
9.87792	8.01753	9.9438	13.0485	7.30723	8.03181	8.52011	8.60169	8.75194
6.79796	8.45049	6.81193	9.7828	6.67284	5.30503	7.81464	9.30688	9.07057
7.30917	7.8154	8.58173	8.88729	7.53781	8.09729	9.66515	10.813	9.28671
6.72501	7.63304	8.68353	12.6299	9.08358	8.18021	11.434	11.5559	6.57985
6.7474	6.88778	12.793	9.54864	10.4112	6.66389	10.2789	6.17105	8.72133
13.545	6.30384	8.70925	6.18795	7.27355	11.7214	11.854	7.97417	7.0611
10.5877	6.39978	11.6442	7.33737	10.6546	6.54498	7.56358	7.98086	7.36735
10.398	5.83176	7.54278	10.5862	9.33812	7.80438	10.8059	8.65224	15.2246
9.68661	9.7962	8.63694	6.91217	7.48152	10.8238	7.24878	10.9735	8.10214
7.71123	6.50105	10.0106	9.36504	9.76321	6.50121	11.2837	8.50954	11.519
8.61042	7.5401	5.93236	9.42096	8.83493	6.779	10.2904	8.28099	9.45007
9.69171	6.54209	9.98496	10.853	7.62423	8.16602	7.40136	9.37651	12.231
8.72051	6.7095	8.20053	6.0502	9.32398	12.3325	9.15761	7.58897	10.8266
9.89762	6.47264	9.41738	7.61374	9.36651	5.21308	10.1281	8.19528	8.89669
10.2463	7.51772	8.93961	10.0473	9.47488	5.12188	12.3973	6.06477	13.1124
10.5055	5.53744	12.5113	8.01535	10.5696	8.28382	12.1272	8.27426	10.1458
6.16293	6.97133	7.51976	10.2312	10.1385	12.7324	8.30085	7.95854	11.2531
7.82133	7.12119	14.062	5.80549	9.41227	7.9772	7.43967	9.45844	9.69863
6.823	10.7501	11.046	8.01884	9.43216	9.81992	8.77236	10.0422	9.29017
6.81717	6.30995	10.1996	6.68093	8.82381	7.41496	8.99974	7.81574	7.43043
7.3759	5.40391	7.35314	7.05582	10.5982	8.0189	7.05991	9.96554	8.86397
6.32798	12.2871	8.23332	10.0628	4.90428	14.8563	5.10342	7.59896	8.4745
5.21863	6.62139	11.2939	10.8109	8.1485	5.67388	10.2702	12.7811	9.09652
6.89431	5.80011	8.85658	9.70665	10.0247	8.02817	8.77714	7.21357	8.61669
8.70796	14.249	6.35712	8.30135	8.66533	11.4124	9.92782	8.3485	8.89012
7.17082	11.3427	8.94322	8.77947	7.72217	8.5017	9.51372	7.31157	8.19422
6.87312	8.92131	6.69565	7.7844	7.66746	10.8386	10.7486	9.69883	10.5258
7.99828	12.0083	8.42524	9.33872	6.06427	10.4944	8.99445	8.0682	10.3738
9.87855	10.1915	10.9898	6.53986	8.86788	9.77301	11.2194	9.95805	7.98304
8.75577	5.18811	8.90122	8.71235	8.31125	10.2839	6.99873	10.6031	12.7361
6.75476	5.98804	5.81791	8.81224	6.58856	7.90738	8.66171	9.48552	9.4651
10.1804	4.98876	7.33233	7.28069	10.6158	9.06726	8.2522	9.01963	11.6281
7.00111	6.43113	5.70894	5.6488	10.9489	10.5185	9.53696	10.8567	12.576
7.41957	7.264	8.20356	8.95236	8.9378	7.75008	10.1304	10.5603	11.1749
9.28598	6.24775	9.18245	8.68993	7.66637	5.86261	12.5128	9.43411	16.3483
7.39872	9.09635	6.46273	10.6383	7.95218	10.0255	10.8645	8.01778	10.0301
12.7977	8.35802	9.37789	10.6207	7.92074	7.61395	9.24789	8.86476	7.75993
10.809	6.9876	11.8192	5.11818	9.60379	6.86943	7.28488	8.55109	8.3049
9.69383	7.43408	6.18421	6.39129	6.36305	9.06244	12.4345	9.71861	12.7878
8.86789	4.90089	7.1156	5.48677	10.83	5.16875	7.13499	10.3683	9.33482
7.56161	6.47247	7.07842	5.86757	9.38705	11.0933	8.95943	10.0329	12.8346
10.9657	9.11525	6.16835	9.26772	8.31038	8.07416	13.7033	8.49599	8.91741
11.6403	8.05605	11.0643	6.47309	5.50112	7.08228	8.67211	8.05956	14.5409
8.54881	7.5625	7.25288	8.31079	10.4902	12.1097	7.09728	8.5478	9.56713
8.44286	6.19655	11.6314	10.9527	13.2157	10.1687	10.1156	10.0402	8.23965
10.0803	11.1139	5.86696	6.72537	10.947	7.90635	7.89303	7.75609	10.7927
8.01985	9.23585	9.85515	11.0949	9.65483	8.3501	10.9252	12.9811	8.06545
8.77717	16.5959	6.95699	10.8134	7.40345	8.58252	7.96527	10.7085	11.6534
6.94589	9.47465	7.90576	6.06006	5.68217	7.28294	10.0372	9.65227	8.78869
9.51797	5.43631	8.56779	8.15869	4.68688	8.12326	8.0299	10.4577	13.0359
7.15042	6.75262	9.69498	6.05966	10.6252	7.74743	8.88709	7.55828	10.6677
10.8831	6.13626	10.6821	10.6448	10.7011	8.56829	9.96408	8.96391	8.11198
9.46648	5.61779	8.19567	9.67804	9.02502	9.85013	10.6382	6.81663	9.08677
10.1602	4.96331	10.8628	8.56223	9.40906	7.4239	6.64185	11.962	10.0944
8.21569	8.27518	8.37745	9.18815	7.54077	8.58179	8.6108	7.52292	13.7919
12.1365	8.4606	9.68702	5.15776	11.5455	11.7446	7.48362	8.074	9.00672
7.97631	8.35164	6.37365	10.9884	9.18318	9.91196	8.36272	8.19057	8.57207
6.05254	6.58167	12.4458	9.5145	6.29619	8.38093	7.6455	8.98878	8.34573
8.49933	7.93024	11.93	8.01319	8.50787	7.42893	6.85991	5.86086	9.05776
8.76211	6.43802	6.40415	12.7489	7.46599	10.5593	8.67004	8.85676	10.9573
9.94666	9.03804	7.733	5.65162	9.48059	7.33601	9.21791	5.67444	8.13581
7.83866	10.6318	7.03946	8.26572	10.0754	10.9836	9.71053	10.2558	9.12149
9.38335	7.15592	14.63	4.8144	7.87012	15.0962	5.53296	9.27842	7.61716
7.5918	6.08452	5.59427	8.87364	7.21475	9.18832	5.69855	9.5842	14.2181
8.60637	8.23205	9.9313	8.83601	6.91648	8.90082	11.1183	12.5655	10.623
7.75926	8.0861	13.0709	8.4415	8.21843	8.25396	7.98999	8.67771	10.5451
7.75222	10.3171	8.5316	8.93856	11.4767	7.23166	7.65135	10.0859	13.24
7.27458	7.05561	5.61251	8.66205	10.1594	11.1995	4.38096	10.3261	10.8383
6.65241	7.92824	14.5745	5.21933	7.75301	6.38212	13.3088	9.2817	9.84447
7.65423	7.41463	6.5671	7.75345	7.92736	8.12125	5.22366	7.65517	9.67393
8.70498	10.356	7.34661	11.4649	12.301	9.11829	7.22986	9.87712	10.5874
6.62121	7.73602	12.4503	6.50442	11.608	12.7452	10.2208	6.42637	8.76825
7.15831	6.30168	7.82708	6.90238	13.7326	7.79182	9.60753	9.92607	10.3225
5.70876	8.29558	6.67815	9.94628	10.6692	9.01644	9.7146	7.48834	13.7962
11.1846	10.7776	9.91848	4.97312	9.48079	9.99257	9.72678	7.85044	6.39728
8.94685	7.89847	5.85987	11.2963	6.18792	10.7749	5.87824	8.66286	11.401
8.24242	6.14363	6.68877	11.1141	8.33294	11.8025	9.94438	8.05174	8.77858
9.68588	7.09355	10.6435	9.12162	12.5242	10.6172	11.1356	7.21263	7.37178
14.0814	5.89311	8.35351	7.6245	6.94425	9.48545	11.6021	9.2043	9.99619
9.33692	5.2485	4.77475	6.68058	7.21379	9.08442	9.24906	7.94231	11.0064
12.5575	5.42941	6.53778	6.83758	9.23225	14.4265	7.29791	8.10128	8.1973
6.16061	5.34168	8.10402	10.6098	8.0858	7.94336	7.07487	9.30002	7.37804
9.12769	11.2042	12.1096	10.0995	9.09981	15.0208	9.85619	8.5204	10.929
10.2133	10.227	8.86474	7.41952	11.5582	7.78459	13.7516	8.59526	10.6046
7.02571	11.8744	13.1708	6.53467	11.1117	6.25444	8.77191	8.15177	6.3418
10.0604	9.44324	9.26638	6.0987	6.30062	9.6557	10.0552	6.61092	11.5591
8.23358	7.59557	9.03226	9.46574	15.2168	8.01459	9.19597	7.55593	12.6676
8.36258	6.20228	6.09225	7.19834	8.56548	6.73303	9.03032	9.52012	13.2394
8.11314	7.266	11.1308	6.75198	7.98479	8.18752	8.56713	7.02641	10.9055
6.8163	13.0082	8.74006	6.04237	10.2031	10.6858	7.40479	6.42603	7.43303
9.71038	8.27442	7.65585	6.57292	9.67257	13.7767	6.4067	10.1306	8.9685
6.31961	9.70412	10.4486	10.5595	9.01545	13.5339	7.70417	9.78662	7.87726
7.87471	6.83489	6.75653	10.9223	12.7615	7.59106	11.4557	7.65139	7.7832
11.0373	9.97172	9.58549	10.1374	8.2135	7.1475	6.87817	10.628	10.3025
6.87372	7.51457	7.6272	8.19631	8.01742	14.8991	7.95885	8.60589	8.00618
9.72638	5.38774	10.8615	9.84491	5.17983	12.2611	9.13711	11.0991	9.31204
7.91451	9.44568	8.67749	7.7762	8.45908	8.88601	6.75615	9.43506	13.3336
8.30687	12.1827	10.7568	8.5041	6.49337	7.07449	7.81468	11.9967	15.8775
9.91682	6.48285	6.67736	12.4752	11.063	9.64107	9.80565	9.12392	9.84597
9.98212	6.40777	9.43567	4.95438	11.5847	4.76851	9.11995	7.65893	10.142
9.17105	10.517	9.64727	9.346	8.57567	10.8829	6.57574	10.0259	7.98359
10.331	7.45848	6.2771	6.81334	10.0012	8.9557	8.1518	9.67965	7.88674
6.4985	12.8051	9.24084	10.3428	7.72523	6.06857	8.91149	7.54999	9.36844
9.46777	9.28766	11.859	8.87945	10.0248	6.41591	11.3886	7.53078	6.01055
6.01816	7.10348	10.3219	11.5348	10.1409	7.46603	9.08878	8.71814	7.22199
7.0421	5.99495	6.15252	9.17178	8.81548	7.04871	12.1027	9.19546	8.10416
9.27357	10.9664	7.58132	10.7174	9.0574	6.07269	10.2056	6.39628	8.35775
6.32148	7.98501	5.96628	6.23418	8.25693	9.25234	10.9969	7.9206	11.6034
8.71872	10.4118	8.33909	12.1708	10.3323	8.67701	13.2375	9.15557	11.6118
7.81548	8.13622	10.8808	8.7076	5.96429	6.66593	9.19399	11.0321	10.1265
9.18903	12.5178	10.3325	10.0832	4.53456	9.65868	7.76401	7.6173	8.66305
7.60271	5.74813	7.28433	7.66509	7.70105	12.7352	6.77549	7.47084	11.2395
9.25487	8.7408	11.1099	7.16102	10.1724	6.48224	13.5645	6.70052	12.4813
9.58884	8.5391	6.36594	8.9863	11.3028	8.62766	5.67997	10.8919	8.08895
6.58381	9.71782	9.80613	6.39539	9.92426	5.08895	11.0384	8.48271	8.51535
9.41816	7.49958	10.684	9.06744	8.75539	6.49496	10.3808	9.3462	7.70422
13.9264	12.2804	7.79938	7.86533	9.43949	13.7878	9.32909	9.29438	7.12459
9.25413	12.2832	7.82675	7.1821	5.86627	11.3874	11.1007	8.22144	11.368
9.68944	7.81171	11.8436	9.01711	7.60366	8.24869	13.5546	12.108	8.89256
8.83515	11.1703	6.05141	4.70276	6.72128	6.66815	8.69127	7.49047	10.6903
11.0237	8.3118	7.55987	9.18621	6.70317	7.62771	11.2233	8.55186	12.543
11.1337	6.21628	5.55781	11.8169	8.63589	5.33296	7.29387	8.27027	11.0887
8.40145	6.57971	5.06438	17.8154	9.11834	11.6143	10.1433	4.98525	11.793
13.3294	7.17987	11.1904	5.61153	8.28301	7.43412	6.04242	8.90088	5.48802
8.37671	6.79644	7.02551	9.73516	11.1709	10.8265	7.95285	8.66262	7.92326
8.91191	9.41036	9.2362	9.38606	6.58253	7.85912	9.08167	9.12946	9.07948
12.8319	5.94916	10.5333	6.66052	11.3392	9.82823	10.4667	8.27368	12.703
10.5323	6.7502	5.19425	7.09762	6.79847	9.61518	13.4091	9.55667	6.14177
7.91071	8.54958	12.7739	8.31893	5.4132	9.62215	11.0342	9.58229	8.54565
9.41627	7.8359	11.7132	7.57835	8.9688	7.32433	8.77152	15.5871	9.15775
12.4276	5.98458	8.33702	9.54931	9.52514	12.1401	11.7972	8.82114	7.00231
5.43917	6.55512	8.97832	8.7846	10.1144	7.29826	7.74595	7.11689	12.3948
6.41588	7.07932	13.5855	7.04103	8.57352	5.7058	8.80093	8.33876	9.50948
10.4003	6.36731	9.09629	4.68609	6.80183	11.0141	5.5117	6.83165	9.64408
10.6941	6.31355	6.35173	7.65492	11.5313	13.5737	7.16854	8.64794	10.1848
10.1402	6.46402	8.95571	6.45098	9.09856	11.0026	12.5028	10.288	14.7049
6.3599	5.92319	11.1859	8.36896	11.7121	12.0601	7.84228	6.14541	10.2031
8.14635	5.76665	7.29005	11.2643	11.2715	8.69257	8.05032	6.85617	9.70745
7.6317	11.6163	9.97946	10.1004	6.86731	8.09873	7.32243	10.0375	9.16309
10.3829	6.79131	8.2931	10.6327	8.99888	5.1395	4.50549	8.03969	8.76151
9.05732	12.1778	8.21843	5.17855	8.91838	6.51995	7.21377	10.1809	7.95197
8.40855	12.7901	9.06947	9.40722	11.0885	5.36981	8.35671	6.67837	7.09013
6.55574	10.8129	7.87837	7.46542	8.73073	7.72267	7.87984	7.74699	14.6106
8.30457	9.314	6.3367	11.3191	10.8367	8.80493	4.96763	10.6752	11.1918
9.7075	11.4474	10.3836	10.8368	7.44532	10.2363	12.0299	7.02105	13.1401
6.97626	8.92035	11.3659	9.17321	7.43726	7.27019	9.54325	8.58122	12.6756
9.04907	6.48037	7.33993	9.363	13.0473	11.7362	7.41745	8.98489	10.8191
10.7783	10.3616	10.8244	9.55445	8.66965	7.36711	12.8486	12.7916	7.19012
9.84183	9.9743	9.4493	11.8229	6.92901	8.5239	8.45026	7.99948	11.4337
7.74638	8.66999	6.33708	8.85838	8.54501	7.94623	7.14267	9.26774	11.3295
14.025	6.18532	8.52848	9.36089	10.7965	7.94318	5.20194	11.8394	10.6664
7.31805	11.3146	6.20707	10.3473	8.78757	4.91459	7.50021	8.99624	11.6792
7.58923	8.83319	7.17486	7.05534	7.24831	11.1123	6.41788	7.04453	11.0647
12.9401	7.71267	8.3818	9.85762	7.35666	8.42978	8.37854	7.50964	10.7309
8.95109	8.4839	5.74201	11.2891	10.5414	12.2981	11.8905	6.46786	13.2365
13.5994	5.39597	7.48855	9.43198	8.52183	7.50465	8.80748	12.4894	8.94231
5.62954	11.3205	6.21606	13.3794	9.37443	4.90238	10.7291	8.57281	12.1339
9.94231	10.724	6.48721	12.737	12.538	11.0068	8.02356	10.2623	7.28711
8.19039	8.15971	5.46012	8.94141	8.83355	12.1126	9.36986	9.27219	12.0379
7.00456	6.40124	10.0484	10.4358	9.99601	6.86213	8.1603	9.42332	8.74673
9.59595	5.46255	11.5646	7.16644	7.87046	9.58762	9.86439	10.8877	8.54517
6.89009	5.60172	6.55273	8.52696	6.51408	6.26548	7.07287	10.8973	10.6815
8.97757	6.07981	9.22604	9.29392	6.95235	8.97864	12.4368	9.78483	7.99061
6.76945	10.7793	10.6089	6.15248	8.47923	9.71384	7.56138	9.23284	9.70461
8.75134	6.50426	8.96867	8.70558	10.1198	12.1954	13.4859	8.39954	12.1629
12.1526	11.5268	11.9473	8.09578	7.56863	7.94962	8.42632	9.04387	11.0954
10.1303	7.91245	6.96802	12.4875	7.94119	5.79917	7.55941	8.44279	9.68745
10.0038	11.2637	7.92586	14.7907	7.9767	8.3768	6.17397	8.52849	10.8372
9.55307	10.2176	7.45888	12.1807	7.45871	8.73664	7.44961	8.63682	8.96656
9.16487	14.7813	10.4824	6.55551	7.86156	8.38072	11.2838	8.10589	7.49496
9.57267	9.95669	8.48941	10.7915	5.42122	8.18606	7.2324	5.87648	14.0956
12.2351	7.35965	8.95567	8.56446	7.05116	13.1775	7.46296	8.92966	11.5004
10.9856	10.6117	8.71205	10.4058	10.4136	7.70695	8.7707	12.0596	7.28692
7.85442	9.23009	9.32648	7.35565	8.08865	9.58051	8.0202	7.7365	9.54865
8.52105	11.7238	8.17435	4.64539	11.0476	7.67152	10.0457	6.43337	9.98912
5.23835	9.60501	9.4252	9.73663	9.34338	10.7919	7.26268	9.36568	12.2283
11.1256	10.6812	11.6351	9.29741	8.52936	11.6211	7.64831	9.83612	8.34419
7.3196	7.46565	8.92112	8.07928	8.30796	7.30685	7.56949	5.54678	9.57903
9.77213	6.42873	9.09749	5.17334	9.69702	9.73303	5.85943	6.71546	8.44199
9.67937	7.75336	9.05459	7.70192	7.30316	8.66137	10.927	8.94664	10.4053
8.67125	9.77538	9.23082	5.7123	10.558	6.7386	10.7006	9.79571	10.0588
9.42501	7.41478	8.06985	10.1249	10.7749	12.8267	10.4252	8.58685	10.0116
5.57106	8.09301	9.36038	6.85484	7.93865	8.31703	10.587	10.9341	9.5739
10.4267		6.57446	9.04453	7.02331	5.46252	10.1953	10.9257	7.5644
9.56761		11.7406	10.7907	10.1572	10.5108	5.76163	10.9312	12.5669
6.97714		10.875	8.84084	11.6864	6.4447	15.6608	9.19671	7.32965
8.3347		12.8821	12.0103	8.60045	9.73686	12.0741	7.26455	10.3712
5.87075		10.3014	7.03613	10.9602	8.55497	9.47614	10.7638	8.63667
6.23029		9.368	10.1619	11.6323	11.289	8.80979	10.2355	10.4182
12.3164		8.50706	5.48747	8.75827	8.57144	10.084	7.73621	9.4288
10.2844		11.3859	10.2915	8.75682	5.87156	12.125	9.29883	7.75049
8.6309		10.7341	11.3688	9.21511	8.74766	9.20255	14.4384	8.00921
9.76707		10.6244	5.57543	8.80891	6.62637	6.66569	10.073	11.0526
10.4842		10.2799	6.69031	9.38626	7.1343	6.50427	8.88652	13.2125
7.84233		4.62964	7.96953	7.66334	6.30219	8.09209	10.7941	8.95187
8.08185		14.0323	6.53838	9.87101	11.5043	7.55207	10.3478	7.94126
11.0566		5.46163	6.09293	8.74653	7.67278	7.08545	10.719	11.8328
8.68603			7.59485	9.22887	7.82069	7.26136	11.109	7.22744
9.0201			9.39661	9.03008	13.2728	9.83104	8.82508	9.79182
9.32829			7.94939	11.3074	7.12456	6.93567	10.6064	12.8225
9.6149			9.92592	8.73464	6.67424	8.04104	9.70191	9.94875
7.57005			8.32921	9.7221	5.86352	9.33305	13.3698	10.8488
6.54909			5.27511	6.0618	8.04082	7.26981	8.83972	8.01129
10.6422			10.2917	6.96059	9.3857	7.47879	10.1461	7.91739
8.69686			12.6199	13.545	7.69822	8.82304	12.1503	9.0007
11.2106			8.4282	7.37814	8.57183	8.03086	9.93933	13.1527
11.9381			10.5981	8.86196	6.31495	10.0979	9.07946	14.7721
8.94625			10.2866	8.89641	6.27612	10.0821	8.69548	9.26788
11.2004			6.73583	9.43432	6.26118	9.08474	10.0117	11.2128
9.36342			10.7399	8.7392	7.62628	9.78866	12.2101	8.39342
9.78802			4.7904	8.97534	9.14238	10.8018	7.886	9.33227
6.26346			11.1702	7.28327	6.27024	6.45954	7.58924	9.92775
7.74913			10.8179	6.76087	4.87857	6.93329	12.7375	9.49203
6.72022			11.9035	6.16238	6.22001	9.88671	10.5995	11.5797
6.73889			10.3953	9.92009	7.58961	8.14233	9.11101	11.9352
5.54264			9.17803	9.17178	9.18007	9.70226	6.50593	9.33364
17.4193			6.25543	8.91709	7.56447	7.21582	7.02053	9.28802
8.40151			7.14823	12.2242	8.62431	14.0801	8.48266	14.3308
9.13908			10.303	9.13765	11.9786	7.08178	7.74686	7.38767
10.8248			7.26564	6.96627	11.962	8.10345	10.2373	9.54049
8.35016			15.6257	12.7065	7.84825	10.9949	10.3762	11.2034
10.442			12.0058	9.38605	11.3971	8.19625	9.7003	10.9002
7.76121			7.37823	9.12476	7.39182	6.06016	9.34315	10.3482
12.8393			8.54594	8.06148	5.49651	9.65556	9.17482	9.3133
10.1406			9.11251	8.43346	11.9415	7.38626	8.90665	11.9386
6.32878			7.67039	8.18909	7.13104	7.89993	10.121	8.37036
6.26522			7.43975	13.0577	9.10548	7.67859	12.3836	14.0192
8.29809			11.7213	11.1279	7.56119	6.90396	9.27404	7.42853
8.1239			7.5897	7.75983	7.2343	8.64507	7.18556	7.06738
6.45881			5.56127	10.557	5.9228	8.84677	10.9433	12.1484
11.438			5.85558	7.69829	6.66434	6.79514	9.33309	9.92382
10.5551			7.5595	11.1455	5.98251	4.65008	9.17708	9.34333
10.996			9.50612	10.7147	7.43513	6.72909	10.9933	10.1765
7.71447			7.48754	9.20523	6.38873	7.35864	9.27879	13.086
7.29027			6.82215	7.39968	10.8961	8.42716	7.33136	9.58524
6.80181			9.35173	8.57698	6.9278	7.98222	9.62274	11.2886
9.85206			6.06904	8.86915	7.78642	6.37004	6.65804	10.5225
7.80039			12.584	8.21146	7.97284	10.5148	6.75388	10.5865
9.71629			8.93166	8.71176	5.02095	6.38111	7.31974	9.47837
6.65099			5.5114	9.48592	7.77639	6.95283	8.92648	10.824
6.76069			7.70769	9.38057	10.1144	6.03365	10.099	8.6955
7.46673			9.6954	6.41443	6.32287	6.22114	8.48964	5.91695
8.07596			6.48085	10.2291	7.35793	9.17646	8.06905	7.70409
10.0672			6.6845	10.6339	13.9878	13.0549	11.2518	11.8604
13.4062				13.241	7.58071	8.77269	11.9405	8.07897
9.50327				7.84458	7.88771	7.72854	8.68151	7.47088
8.4652				9.4539	6.34061	5.62723	8.03764	8.85778
8.2796				10.7802	8.07225	7.90411	7.67493	9.22673
4.85894				5.50242	6.47959	10.1024	8.41298	8.55359
9.13301				7.13869	6.92183	8.35699	8.1919	12.4637
10.9998				12.672	7.78932	13.5557	7.98532	12.5364
9.2795				8.60708	6.50163	10.1978	8.53835	13.6263
8.26529				7.42464	6.58009	7.59518	6.73723	8.62715
10.4572				5.75259	9.68285	9.22921	9.54452	11.4394
11.3924				8.13336	11.7498	7.9221	9.09836	10.1261
9.87745				6.31779	7.41902	7.48792	10.0625	9.76704
9.80352				7.90056	6.0613	6.69322	8.7411	8.1812
10.1222				10.0157	6.22789	8.30983	7.99154	12.7985
7.88149				9.32756	5.74259	8.35741	6.80913	10.6426
6.54709				9.95237	5.68154	8.59621	9.84246	7.67092
6.87944				10.0771	11.7901	6.03141	8.81644	9.77994
7.58304				13.1131	12.1592	12.9008	7.31798	8.91144
7.30091				9.65484	7.96371	8.74134	6.26704	9.64622
6.0545				11.4607	6.74624	9.25563	8.12668	13.3034
12.024				10.2458	6.317	7.88753	8.83235	11.7517
6.64914				14.0442	7.63881	6.5717	8.56466	14.4972
9.79785				9.20194	8.13635	16.0027	6.81602	13.8266
5.94621				8.34701	7.91862	7.32365	14.7051	9.84517
8.70811				10.2517	11.6389	9.97506	8.61974	9.61565
7.34814				8.208	9.75131	8.00346	5.78204	9.86714
7.34691				9.89566	8.81684	6.36156	8.92387	11.8859
8.80102				5.52071	7.39614	6.89691	7.71277	9.65381
9.63572				11.2161	6.53034	8.86706	8.06996	6.95001
6.57243				9.0475	9.46953	6.34694	6.3689	7.89007
10.8323				6.04382	6.94408	9.16434	5.46087	9.37087
7.76384				9.85234	8.42791	8.44768	10.1889	7.44166
6.57267				9.63389	5.73755	7.75882	7.34221	10.9838
6.06384				7.68952	6.71151	9.10853	9.56776	9.98611
12.4303				8.40556	9.62169	9.64932	5.16258	10.5611
11.857				8.49561	10.861	12.3837	9.20745	10.3064
6.10101				7.72373	6.27406	8.39026	9.7815	9.90233
8.86752				9.09891	7.82763	8.25314	8.45597	11.6447
10.717				7.12016	9.46651	5.49324	7.91563	10.6742
10.7164				9.6811	6.99177	8.75225	5.56554	7.93611
9.71227				6.26516	9.24367	10.9859	7.8244	12.2904
7.55331				7.75305	11.6515	8.25437	9.14333	7.1062
10.2687				9.17094	6.28649	8.22846	8.69507	10.1959
8.04436				10.4632	11.3859	9.80346		12.3665
9.9347				7.3583	6.42986	7.0018		10.7627
7.36517				10.459	7.50461	10.6035		7.33712
7.7163				7.48861	6.98789	4.96455		8.78915
8.53149				8.87837	8.3993	6.32801		14.905
10.8835				5.90042	5.17842	8.46724		8.21778
6.46665				9.19609	7.73602	10.2045		13.8903
9.94562				10.2584	12.0784	12.1023		5.699
13.0672				10.785	6.47914	6.55529		12.4442
9.05061				9.01255	10.324	8.53591		11.462
9.43852				9.1549	9.12662	11.0265		9.5977
6.62033				8.96255	9.5183	5.66759		7.94878
7.57248				4.51663	10.1724	8.58754		12.2434
10.1353				7.59389	9.34864	9.31868		9.42351
9.05901				9.0198	6.90176	13.8257		11.7486
8.91235				11.7673	10.887	9.2412		8.2997
9.36789				12.1111	6.46913	6.82713		7.29704
9.04074				7.9132	8.41029	12.0047		13.2034
7.57476				8.6711	8.26067	10.4057		10.5237
10.4119				11.3474	11.9148	10.3335		6.33718
6.78086				11.512	12.6912	6.7931		11.0596
5.56083				10.7536	7.77536	6.51325		11.4565
8.73792				10.0355	7.869	6.6823		9.23738
7.05473				7.90964	8.75042	9.39374		9.92355
6.45913				6.94144	7.83204	6.96272		5.82196
5.71441				9.71194	10.1274	8.77109		11.1122
5.21097				8.52742	11.4364	7.44003		8.35576
9.92784				6.30565	11.2333	5.11024		10.557
8.24108				8.14666	7.19536	8.66501		10.4517
9.31217				7.88053	6.40902	9.03355		8.83685
7.27184				7.64614	8.71836	10.6564		8.49667
8.96681				7.88823	9.81104	7.47431		10.96
9.73758				9.02009	13.2488	6.89844		11.5526
6.11273				10.3253	8.60026	9.07896		10.059
10.3088				5.53624	8.50343	9.88939		7.35713
6.6607				9.12927	6.78906	8.81618		9.97567
7.86169				9.44069	8.28549	12.0056		11.0086
10.7423				7.73718	8.46443	10.7418		9.12924
10.6251				7.65969	9.09958	8.90407		8.59237
9.88092				7.78311	9.48676	9.50076		10.0411
5.72343				5.90359	12.9754	7.26633		10.6246
7.46694				9.06782	9.10941	11.5266		8.88772
7.50726				7.2196	10.2743	7.82682		9.83963
6.95158				10.921	6.86173	8.80412		10.461
8.48022				9.66819	8.2472	5.59934		9.49111
8.08657				7.97996	7.15072	14.2243		11.7084
8.3005				6.89674	9.46016	12.3593		8.32547
7.57437				9.46833	7.67288	10.8683		13.1297
6.3703				10.7472	7.96741	7.88685		7.11368
6.82673				4.78752	7.89882	9.34267		10.4294
9.87838				9.1761	7.08779	5.65064		9.36917
8.0469				9.58906	13.6614	6.93483		7.79
11.7314				7.91898	8.79228	6.45435		8.13583
11.2923				5.32897	10.3033	11.8208		12.6256
9.77218				7.67226	9.68548	7.89867		11.0266
5.95907				7.48547	8.59865	8.07755		8.58346
7.75941				8.59	9.04669	7.41769		11.0982
8.82226				8.62087	9.69426	8.98613		12.0801
9.60547				8.35617	7.03174	10.828		9.6584
7.26075				8.42464	11.6339	6.31538		9.50645
9.70705				9.37978	7.954	11.192		10.6156
8.66146				11.2492	6.44817	7.91347		13.5617
10.2616				8.71618	8.16173	5.30115		7.87156
7.79152				10.8335	7.36459	8.26509		12.1007
7.7045				11.7293	8.67522	9.09891		9.30277
9.74319				5.06194	6.54742	12.3		11.7388
9.50069				7.02595	9.97122	6.29025		8.97263
8.95355				9.84047	7.14107	7.73861		9.19267
10.2787				10.7054	7.38155	8.33895		10.6897
9.13806				9.15173	7.17599	7.41232		9.74539
9.53161				10.5572	11.4632	10.2529		7.83397
5.99216				8.04241	7.11114	8.47565		8.86045
9.31796				7.94449	7.82812	7.90129		7.95101
7.41441				5.79653	7.04605	7.03958
6.93819				10.8604	9.60612	6.42433
9.92154				15.9638	7.44137	11.8627
7.53468				11.7054	8.22852	9.4986
10.3765				7.91092	8.06772	6.46071
7.83047				8.39468	12.5879	6.37909
6.31117				9.88273	10.3148	5.59276
6.63538				10.8027	7.6172	8.91073
9.38278				11.1554	11.7537	9.66657
7.09887				8.07972	7.61962	7.23862
7.18823				12.7109	9.71961	9.6705
7.59072				7.55837	12.2592	9.2635
7.62597				7.17091	7.34878	14.5009
9.76433				9.32633	7.54971	9.35786
7.42302				6.42366	10.1831	10.6082
6.83392				8.15491	7.07992	11.1381
8.49552				6.45683	10.4804	8.89984
5.51067				12.0077	8.42774	6.80048
6.06432				9.75521	9.41435	10.2451
7.29069				7.91691	8.88546	9.1292
9.14591				9.48236	9.95727	7.97497
8.20041				9.29762	6.40505	9.33095
7.57751				10.772	6.08035	7.97909
6.91255				11.6405	11.0734	4.99815
6.67786				10.0121	11.1967	11.5056
6.20035				6.87227	9.1061	8.07623
9.14148				10.0191	9.5453	8.99498
8.70364				7.61725	5.54072	9.5351
7.03212				8.24346	11.3237	10.514
11.1381				6.89936	7.88298	10.9088
14.5491				8.42991	11.1019	7.1296
6.07315				5.71777	11.903	8.16586
7.94243				7.27872	8.19635	14.6929
12.4278				7.84179	5.92552	9.59911
13.3908				8.92826	7.56071	5.97647
6.49668				12.2716	6.00024	11.1027
6.66261				8.21805	8.36198	6.70677
6.63236				8.47669	8.12004	6.91412
10.7186				8.21308	6.51938	13.1881
9.08046				10.7691	5.60937	5.85235
10.4002				8.67619	7.79878	11.5914
6.92133				9.61137	7.72206	7.4639
7.55633				7.63682	7.91075	9.89137
9.34234				8.18401	8.40448	11.1565
6.92993				11.5519	10.3076	7.09737
6.96439				7.58381	6.30997	10.6497
10.1592				9.46558	8.89335	11.3864
8.3985				13.7583	9.7744	7.1588
7.18562				5.62969	8.8887	7.86332
8.09649				5.08238	9.92551	11.5186
8.16675				9.27571	8.6477	6.71178
6.18799				8.83853	6.44616	8.48219
12.6214				10.7846	9.49292	8.20945
6.81689				12.0991	6.30877	5.97636
6.93785				8.49288	9.52041	9.56963
6.72036				8.6169	9.4985	9.82758
8.74738				9.65487	9.00403	11.8369
6.80959				12.0865	10.2357	8.18044
6.55915				10.7607	12.5982	12.6858
8.42825				8.73472	7.95732	9.49406
7.58307				8.24792	11.9497	7.13845
9.49715				8.99224	8.01396	10.5782
6.76574				8.57131	7.2684	16.8312
8.76532				6.81228	6.69535	6.48532
6.55394				8.55053	8.15672	7.38315
6.52926				6.61507	6.36051	7.68674
6.56554				7.99992	14.8959	9.55231
7.95759				8.04969	11.5684	8.84302
8.03458				7.2377	10.8515	7.42889
11.7969				9.51946	6.9613	8.6145
9.55942				7.36721	8.33127	7.6869
8.12797				9.29447	7.01043	6.57577
6.43243				8.99707	6.65493	12.6413
13.0732				12.5483	12.027	11.0766
7.22928				10.0227	6.10647	6.00701
8.42714				5.9028	6.15702	14.7599
7.11554				10.8864	6.93888	8.55909
6.4741				10.3969	6.86837	9.09695
7.97794				5.76428	7.92195	17.0651
10.802				9.37237	7.61151	7.01019
7.84679				8.59767	8.52163	7.23491
7.88733				5.60339	5.79436	7.78092
7.33938				11.4997	6.81013	8.15135
6.81753				8.83858	6.85841	12.7066
7.38135				10.1751	11.0837	5.43763
9.91375				8.88135	5.89271	11.6857
8.49539				6.71962	7.65058	11.6846
9.06329				9.21606	7.0697	9.75664
11.7295				8.51461	10.0909	7.67983
8.22839				8.9981	5.94761	8.20525
9.53168				10.314	7.05416	6.61576
7.02095				9.52563	6.37276	7.65874
8.37692				11.0536	5.49794	4.89406
10.2726				11.6075	7.52263	9.12635
6.83014				10.0945	11.0617	5.70393
9.7408				8.18989	8.22856	9.83569
9.73445				9.76967	8.3243	9.62521
10.1493				9.4549	5.56056	9.40089
12.903				9.08604	9.78485	9.77166
7.29869				11.0061	5.35938	6.26685
8.3218				8.28622	7.15162	6.51555
7.94093				5.15583	7.45259	9.07789
12.0755				10.8115	6.03112	7.80769
9.32449				8.25967	7.75018	6.83694
8.94478				10.6494	8.48826	7.0027
8.46763				9.79134	7.39723	11.7307
9.45373				5.89895	8.29353	9.35932
7.1878				9.62402	5.94592	6.28394
11.173				8.13988	6.05435	8.52167
8.97815				17.054	8.88668	7.37615
8.33946				12.8984	8.69804	8.33348
7.96765				6.46469	8.60446	10.0602
11.4715				6.42405	8.1297	6.95618
8.95292				5.96308	10.9442	11.9649
8.97661				9.97321	9.79378	9.12602
9.93692				9.11408	8.7448	13.345
8.40073				12.3418	7.48826	10.0206
8.82152				9.48355	7.04945	9.32632
7.74504				10.9616	6.14431	9.57557
9.43615				8.60164	13.051	9.82221
5.98185				10.4393	5.43436	11.2097
6.98033				9.4664	6.02153	10.4588
10.6671				11.6031	6.54155	8.02953
6.23552				8.97499	6.81814	12.7286
9.30911				8.20948	6.85569	7.85805
8.82712				10.0167	10.7676	11.7338
8.62207				10.4885	4.94802	11.8692
9.42757				8.92889	7.02602	10.6576
6.05804				7.26126	7.50889	7.9705
5.57835				8.39668	10.3997	9.02425
7.54502				12.8316	9.57004	7.39209
9.13564				6.8655	11.1336	10.8007
9.16617				10.3509	7.7422	9.73302
10.0822				7.96243	9.88088	12.0651
9.80577				7.77685	8.97016	7.92057
9.16279				9.08575	6.48261	11.4874
5.13596				6.81484	7.74909	9.4599
7.95986				10.3511	10.5908	7.60643
9.9394				11.7403	7.98845	9.1925
6.6074				10.4137	11.0486	9.84522
6.95681				13.7134	7.38622	9.20445
8.39493				10.0228	11.404	10.5981
11.5783				9.80256	8.37851	8.48426
11.5793				7.84192	7.3698	15.0005
6.76001				5.88318	10.8816	8.30174
9.56399				5.90685	10.089	7.43696
6.29511				6.79996	6.63763	8.94687
8.13362				9.74812	5.90315	15.0355
7.83623				9.03129	8.70724	6.75601
11.6981				10.0136	8.24245	9.32094
9.09661				9.45126	8.33189	8.82448
8.55982				8.25174	9.09032	10.9375
9.76975				7.3862	12.2362	11.9789
7.21113				7.3188	7.01468	9.58508
6.91407				12.8863	8.39646	8.03375
6.29515				9.17503	8.87184	6.54018
9.8584				8.61989	7.19827	7.14872
7.10346				6.39715	5.37688	8.31094
9.05514				6.60904	6.41805	5.9839
6.66048				7.98333	10.4946	8.9684
10.8759				8.24474	8.42153	7.05772
6.99727				5.82472	5.73048	7.47388
7.5103				7.97219	7.79143	9.22102
9.18873				10.0234	5.13795	4.74624
12.4807				8.20967	10.2118	9.26806
10.4555				9.20862	8.3411	9.55563
6.53119				8.38773	10.9011	14.6461
4.89329				7.06099	5.2103	10.1972
7.82653				10.8666	10.8747	13.128
12.2318				9.33339	12.6934	10.5745
5.66005				8.07629	8.16665	8.00374
9.73795				8.50642	9.74788	7.75207
7.62146				9.9351	5.75382
12.6072				7.46037	4.60033
7.57874				9.86196	8.04688
6.48599				8.85479	6.01352
10.3698				9.27239	5.55237
9.1856				7.71741	8.39108
9.58978				8.65546	9.71803
6.18968				10.2868	10.7592
8.45806				7.77427	5.75154
8.2574				6.14881	10.5857
10.8046				8.75569	5.7075
14.5864				8.41565	8.23915
8.11283				9.56136	8.46203
6.59493				9.30068	6.59707
8.2469				9.90388	8.34678
10.4123				11.1197	8.19741
14.3408				11.1408	6.78024
9.31884				7.12317	5.0356
9.09378				6.43382	6.8128
7.59761				9.76657	4.46485
6.95947				5.47237	11.6093
7.58554				8.69272	7.07812
8.04675				10.1443	12.2506
7.50961				8.43372	11.5748
8.09518				9.15358	7.63909
7.97723				6.89347	10.4931
7.96588				8.82077	7.23951
6.95521				6.99725	6.46973
6.74837				8.53994	9.17305
4.41517				10.9386	8.3342
7.64197				7.04003	12.0129
5.64258				11.7882	10.4966
6.83647				9.13998	10.4995
9.00049				9.7552	8.73354
9.2429				8.14555	7.33324
8.30931				12.3456	12.5231
7.40187				6.92997	6.4062
6.89849				11.2988
8.44349				7.87124
9.15025				6.8606
8.19835				7.1994
6.93718				7.31216
7.83932				8.07412
8.83799				9.63403
7.73758				5.76251
9.4539				10.7888
9.35676				9.42779
8.40891				9.25854
11.4385				8.78409
10.2668
9.73209
7.2498
7.97781
8.51711
8.14087
7.74846
8.60977
6.77742
8.29728
6.82882
6.17509
9.3212
10.328
7.93184
6.98644
7.63147
7.51682
8.82891
7.59366
8.19717
6.48984
9.70591
9.66817
6.79957
6.17949
9.8648
7.24609
9.81252
6.72133
11.8919
8.89897
8.34402
8.59577
9.39148
7.82887
11.5399
9.55869
8.66297
5.89508
11.718
