# Supplementary material for: Interaction of human keratinocytes and nerve fiber terminals at the neuro-cutaneous unit
Source: eLife. 2024 Jan 16;13:e77761. doi: 10.7554/eLife.77761 (PMC10791129; doi:10.7554/eLife.77761)
Supplement: Figure 5—source data 2. [file elife-77761-fig5-data2.xlsx]

## Sheet: Statistic_Fig5C
	HC	SFN
Number of values	13	10
Minimum	29.88	19.85
25% Percentile	58.59	30.6
Median	65.05	50.82
75% Percentile	76.03	82.05
Maximum	85.37	97.18
Range	55.48	77.33
Mean	65.25	55.4
Std. Deviation	14.51	28.03
Std. Error of Mean	4.024	8.865
Mann Whitney test
P value	0.41
Exact or approximate P value?	Exact
P value summary	ns
Significantly different (P < 0.05)?	No
One- or two-tailed P value?	Two-tailed
Sum of ranks in column A,B	170 , 106
Mann-Whitney U	51

## Sheet: Statistic_Fig_5D
	HC	SFN
Number of values	13	10
Minimum	0.1169	0.03986
25% Percentile	0.2875	0.362
Median	0.5312	0.9617
75% Percentile	0.8621	4.531
Maximum	1.88	5.394
Range	1.763	5.354
Mean	0.677	2.084
Std. Deviation	0.4868	2.16
Std. Error of Mean	0.135	0.6831
Mann Whitney test
P value	0.3434
Exact or approximate P value?	Exact
P value summary	ns
Significantly different (P < 0.05)?	No
One- or two-tailed P value?	Two-tailed
Sum of ranks in column A,B	140 , 136
Mann-Whitney U	49
Difference between medians
Median of column A
Median of column B	0,5312, n=13
Difference: Actual	0,9617, n=10
Difference: Hodges-Lehmann	0.4306
	0.3371

## Sheet: input_values
ROI	Category (HC=healty control; SFN=small fiber neuropathy patient)	PGP9.5	PGP9.5_WGA_coloc	PGP9.5_Cx43(Cx43_WGA_coloc)_coloc	PGP9.5_free	ensh_ratio(PGP9.5_free/PGP9.5_total)	ratio PGP_Cx43(Cx43_WGA_coloc)_coloc		% ensh	% Cx43 contact
1_01	HC	64810	15055	196	49755	0.767706	0.00302422		76.7706	0.302422
1_02	HC	28932	12549	74	16383	0.566259	0.00255772		56.6259	0.255772
2_01	HC	18715	2856	51	15859	0.847395	0.00272509		84.7395	0.272509
2_02	HC	34435	8507	256	25928	0.752955	0.0074343		75.2955	0.74343
3_01	HC	8990	2844	35	6146	0.683648	0.00389321		68.3648	0.389321
3_02	HC	44989	20780	230	24209	0.538109	0.00511236		53.8109	0.511236
3_03	HC	6318	2492	49	3826	0.605571	0.00775562		60.5571	0.775562
3_04	HC	10371	7272	195	3099	0.298814	0.0188024		29.8814	1.88024
4_01	HC	14397	4753	187	9644	0.669862	0.0129888		66.9862	1.29888
4_02	HC	23943	3504	28	20439	0.853652	0.00116944		85.3652	0.116944
7_01	HC	30645	10711	268	19934	0.650481	0.00874531		65.0481	0.874531
7_02	HC	33511	12798	178	20713	0.618096	0.00531169		61.8096	0.531169
7_03	HC	21658	8006	184	13652	0.630344	0.00849571		63.0344	0.849571
8_01	SFN	20293	8982	97	11311	0.557384	0.00477997		55.7384	0.477997
8_02	SFN	4288	3308	128	980	0.228545	0.0298507		22.8545	2.98507
5_01	SFN	51197	10560	723	40637	0.793738	0.0141219		79.3738	1.41219
5_02	SFN	10947	6897	476	4050	0.369964	0.0434822		36.9964	4.34822
5_03	SFN	8427	6754	428	1673	0.198529	0.0507891		19.8529	5.07891
5_04	SFN	3721	105	16	3616	0.971782	0.00429992		97.1782	0.429992
6_01	SFN	14479	9674	781	4805	0.33186	0.0539402		33.186	5.39402
9_01	SFN	32881	17790	52	15091	0.458958	0.00158146		45.8958	0.158146
9_02	SFN	13104	3559	67	9545	0.728404	0.00511294		72.8404	0.511294
9_03	SFN	15053	1491	6	13562	0.90095	0.000398592		90.095	0.0398592
