# Supplementary material for: Interaction of human keratinocytes and nerve fiber terminals at the neuro-cutaneous unit
Source: eLife. 2024 Jan 16;13:e77761. doi: 10.7554/eLife.77761 (PMC10791129; doi:10.7554/eLife.77761)
Supplement: Supplementary file 1. [file elife-77761-supp1.xlsx]

## Sheet: Tabelle1
Sample/Code	Sex	Age at biopsy	Category (HC=healty control; SFN=small fiber neuropathy patient)	Biopsy site/cell origin	IENFD [fibers/mm]	Sample type	Experiment/Figure
F1	female	32.6	HC	dorsal Th10 level	n.a.	London resin white sections	CLEM Fig.1/Fig3
M1	male	27.7	HC	dorsal Th10 level	n.a.	London resin white sections	CLEM Fig.1/Fig3/Video1
M2	male	25.9	HC	dorsal Th10 level	n.a.	London resin white sections	CLEM Fig1/Fig3/Fig1/FigS2/Video2
HC0	female	56.3	HC	upper thigh	10.1	PFA frozen sections	ExM Fig.3/Fig.4/Video3
HC1	female	45.6	HC	lower leg	5.3	PFA frozen sections	ExM Fig.5
HC2	female	43.1	HC	lower leg	7	PFA frozen sections	ExM Fig.5
HC3	female	45.1	HC	lower leg	10.63	PFA frozen sections	ExM Fig.5/Video4
HC4	female	25.1	HC	lower leg	8.59	PFA frozen sections	ExM Fig.5
HC5	female	21.8	HC	lower leg	4.52	PFA frozen sections	ExM Fig.5
SFN1	male	31.4	SFN	lower leg	4.58	PFA frozen sections	ExM Fig.5
SFN2	female	59.4	SFN	lower leg	5.41	PFA frozen sections	ExM Fig.5
SFN3	female	42.7	SFN	lower leg	5.29	PFA frozen sections	ExM Fig.5
SFN4	female	39.8	SFN	lower leg	5	PFA frozen sections	ExM Fig.5
sensory neurons	male	60.12	HC	lower leg	n.a.	iPSC (primary fibroblast reprogrammed) dervied sensory neurons	CoC Fig.6/Fig.7/Fig.8/Fig10/Figs5
keratinocyte line 1	female	52	HC	upper thigh	n.a.	primary keratinocytes	CoC Fig.7/Fig.8/FigS4/Video5
keratinocyte line 2	female	29.1	HC	lower leg	n.a.	primary keratinocytes	CoC Fig.10/Video6
